# Supplementary material for: Strengthening the primary care workforce to deliver high-quality care for non-communicable diseases in refugee settings: lessons learnt from a UNHCR partnership
Source: HighWire-hosted journal article supplement (doi:10.1136/bmjgh-2021-007334), 2022-07-01

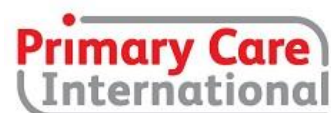

# Baseline Checklist for Non-Communicable Disease (NCDs) Care

**Please complete one checklist for each health facility**

## Community Awareness and Prevention of NCDs

|                                                                                                                                                                                                                                                                                          |     |    |
|------------------------------------------------------------------------------------------------------------------------------------------------------------------------------------------------------------------------------------------------------------------------------------------|-----|----|
| <p><b>1.A</b> Are there any <b>Clinic based</b> health education activities that focus on the provision of care for NCDs?</p> <p>For example:</p> <ul style="list-style-type: none"> <li>• The risks of smoking</li> <li>• A healthy diet</li> <li>• The benefits of exercise</li> </ul> | Yes | No |
| If yes, what activities are happening, and where and when do they take place?                                                                                                                                                                                                            |     |    |
| Which grade(s) of health workers do these activities?                                                                                                                                                                                                                                    |     |    |

|                                                                                                                                                                                                                                                                                    |     |    |
|------------------------------------------------------------------------------------------------------------------------------------------------------------------------------------------------------------------------------------------------------------------------------------|-----|----|
| <p><b>1.B</b> Are there any <b>Community based</b> health education activities that focus on the provision of NCDs?</p> <p>For example:</p> <ul style="list-style-type: none"> <li>• The risks of smoking</li> <li>• A healthy diet</li> <li>• The benefits of exercise</li> </ul> | Yes | No |
| If yes, what activities are happening, and where and when do they take place?                                                                                                                                                                                                      |     |    |

## Early Detection of NCDs

|                                                                                    |     |    |
|------------------------------------------------------------------------------------|-----|----|
| <p><b>2.A</b> Do health workers screen patients without symptoms for diabetes?</p> | Yes | No |
| Where does screening happen? (please highlight): Facility / Community / Both       |     |    |



|                                                                                              |     |    |
|----------------------------------------------------------------------------------------------|-----|----|
| <b>2.B</b> Do health workers screen patients without symptoms for hypertension?              | Yes | No |
| What type of blood pressure machine is used? (please highlight) Mercury / Anaeroid / Digital |     |    |
| Where does screening happen? (please highlight) Facility / Community / Both                  |     |    |

### Evidence-based interventions for NCD Care

|                                                                                                                                                                                                    |     |    |
|----------------------------------------------------------------------------------------------------------------------------------------------------------------------------------------------------|-----|----|
| <b>3.A</b> Are guidelines for the management of Diabetes available to clinicians in their clinics?<br>Are these guidelines....(please highlight) National / Local MoH / NGO                        | Yes | No |
| <b>3.B</b> Is there a foot care service for patients with Diabetes?                                                                                                                                | Yes | No |
| <b>3.C</b> Are guidelines for the management of Hypertension available to clinicians in their clinics?<br>Are these guidelines....(please highlight) National / Local MoH / NGO                    | Yes | No |
| <b>3.D</b> Are guidelines for the management of Asthma & COPD available to clinicians in their clinics?<br>Asthma<br>COPD<br>Are these guidelines....(please highlight) National / Local MoH / NGO | Yes | No |

### Medicine and Equipment Supply

|                                                                                                                                                                                                                                                                                                                                                                                                                                                                                                                                                                                                                                            |
|--------------------------------------------------------------------------------------------------------------------------------------------------------------------------------------------------------------------------------------------------------------------------------------------------------------------------------------------------------------------------------------------------------------------------------------------------------------------------------------------------------------------------------------------------------------------------------------------------------------------------------------------|
| <p><b>4.</b> Please highlight which of the following WHO Essential Medicines for NCD Care are available in the facility dispensaries:</p> <ul style="list-style-type: none"> <li>• Metformin</li> <li>• Glibenclamide or Gliclazide</li> <li>• Short acting Insulin</li> <li>• Intermediate or long acting Insulin</li> <li>• A Thiazide diuretic</li> <li>• A Beta-blocker eg. Atenolol or Bisoprolol</li> <li>• A Calcium channel antagonist eg. Nifedipine, Amlodipine</li> <li>• An ACE Inhibitor, eg. Enalapril</li> <li>• Methyldopa</li> <li>• A Statin eg. Simvastatin</li> <li>• Aspirin</li> <li>• Salbutamol inhaler</li> </ul> |
|--------------------------------------------------------------------------------------------------------------------------------------------------------------------------------------------------------------------------------------------------------------------------------------------------------------------------------------------------------------------------------------------------------------------------------------------------------------------------------------------------------------------------------------------------------------------------------------------------------------------------------------------|

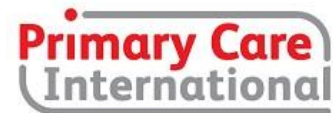

|                                                                                                                                                                                                         |     |    |
|---------------------------------------------------------------------------------------------------------------------------------------------------------------------------------------------------------|-----|----|
| <ul style="list-style-type: none"> <li>• Steroid inhaler eg. Beclomethasone or Budesonide</li> </ul>                                                                                                    |     |    |
| <b>5. Are there stock-outs of any of these medicines?</b><br><br>If so, please state which medicines are most affected:<br><br>Are the stock-outs...(please highlight) Frequent / Common / Rare / Never | Yes | No |

### Laboratory

|                                                                                                                                                                   |     |    |
|-------------------------------------------------------------------------------------------------------------------------------------------------------------------|-----|----|
| <b>6. Are the following investigations available?</b>                                                                                                             |     |    |
| <b>A. Fasting Glucose</b><br>If yes, where? (please highlight) Machines at facility / sample transported / patient travels to another site for testing            | Yes | No |
| <b>B. Serum Creatinine</b><br>If yes, where? (please highlight) Machines at facility / sample transported / patient travels to another site for testing           | Yes | No |
| <b>C. Serum Potassium</b><br>If yes, where? (please highlight) Machines at facility / sample transported / patient travels to another site for testing            | Yes | No |
| <b>D. Total Cholesterol</b><br>If yes, where? (please highlight) Machines at facility / sample transported / patient travels to another site for testing          | Yes | No |
| <b>E. Glycosylated Haemoglobin</b><br>If yes, where? (please highlight) Machines at facility / sample transported / patient travels to another site for testing   | Yes | No |
| <b>F. Microalbuminuria detection</b><br>If yes, where? (please highlight) Machines at facility / sample transported / patient travels to another site for testing | Yes | No |

|                                                                        |     |    |
|------------------------------------------------------------------------|-----|----|
| <b>7. Are urine dipsticks available in the facility that test for:</b> |     |    |
| Glucose                                                                | Yes | No |
| Protein                                                                | Yes | No |
| Ketones                                                                | Yes | No |



## Service Organisation

### When is NCD care carried out?

|                                                                                                    |     |    |
|----------------------------------------------------------------------------------------------------|-----|----|
| <b>8.</b> Are there dedicated clinic sessions for patients with some NCDs?                         | Yes | No |
| If yes, which NCDs are included? (please highlight) Diabetes / Hypertension / Others (which ones?) |     |    |

### Where is NCD care carried out?

**9.** Highlight all that apply:

Where can treatment for a patient with diabetes be initiated? District / Field Hospital / Primary Health (PH) Clinic

Where can a patient with diabetes be followed up? District / Field Hospital / PH Clinic

Where can treatment for a patient with hypertension be initiated? District / Field Hospital / PH Clinic

Where can a patient with hypertension be followed up? District / Field Hospital / PH Clinic

### Who carries out NCD care?

**10.** Highlight all that apply:

Diabetes Treatment Initiation: Doctor / Nurse / Other (Who?)

Diabetes Follow-up: Doctor / Nurse / CHW / Other (Who?)

Health Education Counselling: Doctor / Nurse / CHW / Other (Who?)

Foot Care: Doctor / Nurse / CHW / Other (Who?)

Hypertension Treatment Initiation: Doctor / Nurse / Other (Who?)

Hypertension Follow-up: Doctor / Nurse / CHW / Other (Who?)

Health Education Counselling: Doctor / Nurse / CHW / Other (Who?)

### Appointment systems and call / recall

|                                                                                                                                  |     |    |
|----------------------------------------------------------------------------------------------------------------------------------|-----|----|
| <b>11.</b> Is there an appointment system for NCD patients?                                                                      | Yes | No |
| Is there a system for Call and Recall (Tracing of defaulters) of patients with NCDs to improve continuity of care and adherence? | Yes | No |

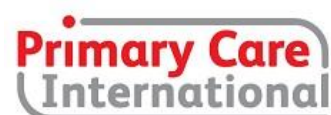

|                                             |  |  |
|---------------------------------------------|--|--|
| If yes, please briefly describe the system? |  |  |
|---------------------------------------------|--|--|

### Clinical Records and Registers

|                                                                                                                                                                                                                                                                                                                     |                                  |                               |
|---------------------------------------------------------------------------------------------------------------------------------------------------------------------------------------------------------------------------------------------------------------------------------------------------------------------|----------------------------------|-------------------------------|
| <p><b>12.</b> Are clinical records kept for each individual patient with Diabetes, Hypertension and Asthma?</p> <p>If yes, is the same record used when the patient attends a clinic AND if the patient is admitted to a local hospital?</p> <p>If yes, are these clinical records paper-based or computerised?</p> | <p>Yes</p> <p>Yes</p>            | <p>No</p> <p>No</p>           |
| <p><b>13.</b> Are there individual disease registers that list all patients known to the facility diagnosed with:</p> <p>Diabetes</p> <p>Hypertension</p> <p>Asthma / COPD</p>                                                                                                                                      | <p>Yes</p> <p>Yes</p> <p>Yes</p> | <p>No</p> <p>No</p> <p>No</p> |

### Supervision and mentoring

|                                                                                                                                                                                                                                         |            |           |
|-----------------------------------------------------------------------------------------------------------------------------------------------------------------------------------------------------------------------------------------|------------|-----------|
| <p><b>14.</b> Do the clinicians who manage patients with NCDs, and the managers who manage the clinic facilities, meet together to discuss the organisation of care of patients with NCDs?</p> <p>If yes, please give more details.</p> | <p>Yes</p> | <p>No</p> |
| <p>Is there any clinical training programme that includes diabetes and hypertension</p> <p>If yes, please list which grades of staff are trained. What was the date of the last training on these NCDs?</p>                             | <p>Yes</p> | <p>No</p> |
| <p>Is there any regular supervision carried out that includes care of patients with diabetes and / or hypertension?</p> <p>If Yes, please describe briefly</p>                                                                          | <p>Yes</p> | <p>No</p> |

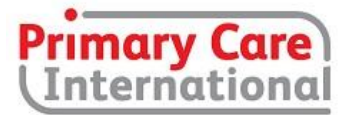

Supplement: bmjgh-2021-007334supp001_data_supplement.pdf [file bmjgh-2021-007334supp001_data_supplement.pdf]
